# Supplementary material for: An enhanced dispersive liquid–liquid microextraction method based on solidification of floating organic drops for the determination of pyrethroid pesticides in tea infusions
Source: Royal Society of Chemistry journal article supplement (doi:10.1039/d1nj05450c), 2022-01-01
Supplement: d1nj05450c1.pdf [file d1nj05450c1.pdf]

## Supplementary Data

An enhanced dispersive liquid-liquid microextraction based on  
solidification of floating organic drop for the determination of pyrethroid  
pesticides in tea infusions

Ziwei Ju, Heng Qian, Nianyou Pan, Yuting Huang, Qinqin Xu, Chen Yan, Wenfeng  
Zhou\*

Department of Applied Chemistry, China Agricultural University, Yuanmingyuan  
West Road 2#, Haidian District, Beijing 100193, China

\*Corresponding author, tel: +86-10-62730244 (W. Zhou)

E-mail addresses: zhouwenfeng@cau.edu.cn (W. Zhou)

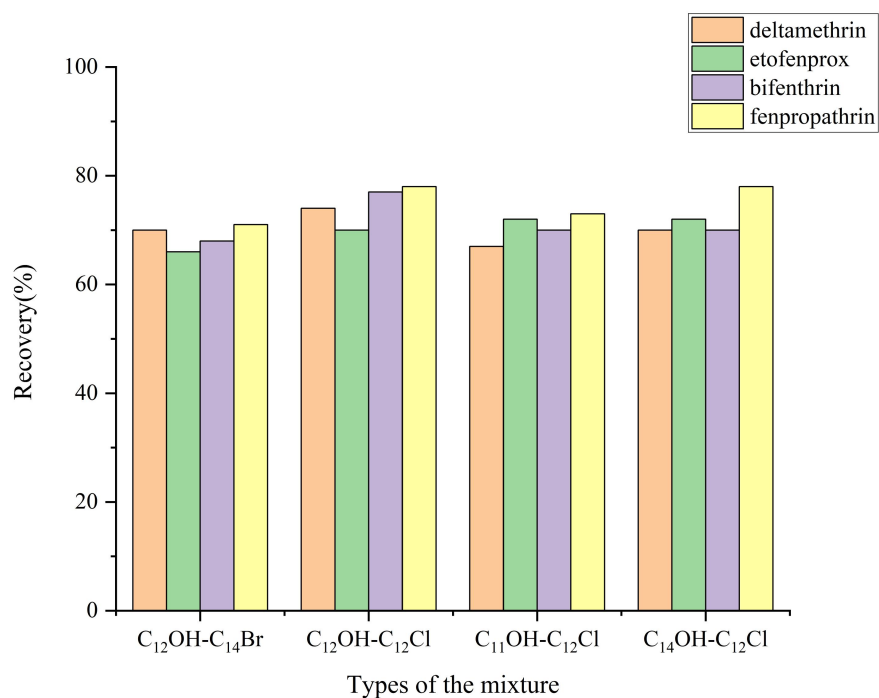

Fig. S1. Effects of Types of the mixture on the extraction efficiency under the following extraction conditions: the molar ratio of halogenated hydrocarbons to alcohols, 1:2, 50  $\mu$ L of the solvent mixture, the molar ratio of [P<sub>4,4,4,12</sub>]Br to KPF<sub>6</sub>, 1:2, 160mg of NaCl, 50°C.

- \* C<sub>12</sub>OH: 1-dodecanol
- C<sub>11</sub>OH: 1-undecanol
- C<sub>12</sub>Cl: 1-chlorododecane
- C<sub>12</sub>Br: 1-bromotetradecane

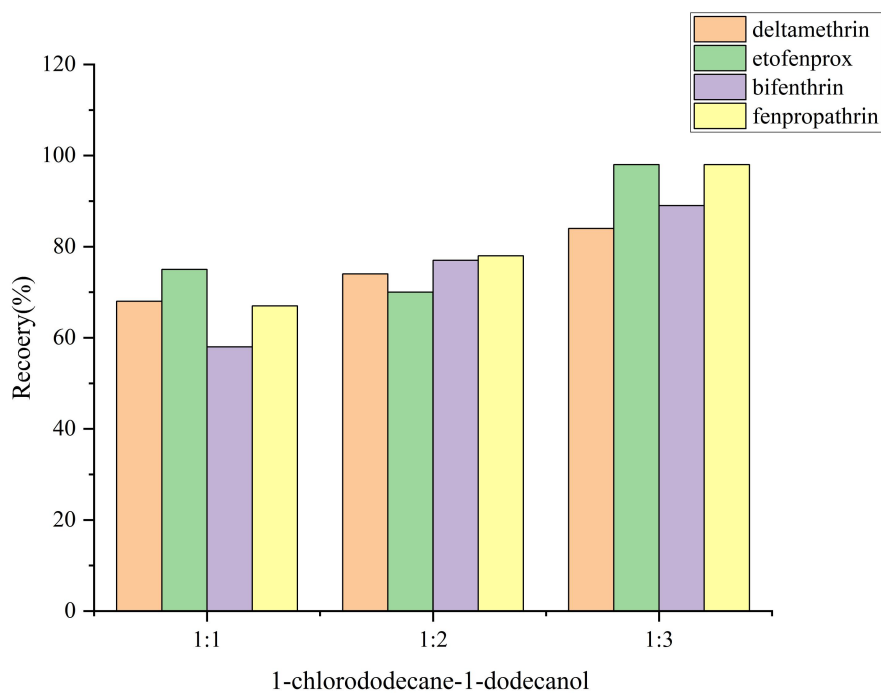

Fig. S2. Effects of the molar ratio of 1-chlorododecane and 1-dodecanol on the extraction efficiency under the following extraction conditions: 50  $\mu\text{L}$  of the solvent mixture, the molar ratio of  $[\text{P}_{4,4,4,12}]\text{Br}$  to  $\text{KPF}_6$ , 1:2, 160 mg of  $\text{NaCl}$ ,  $50^\circ\text{C}$ .

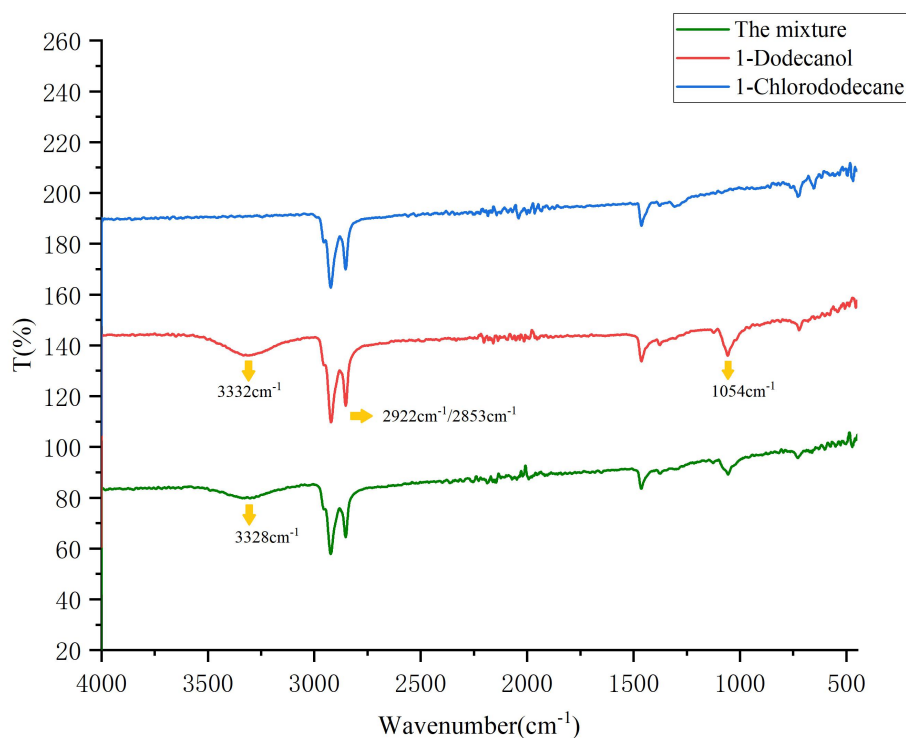

Fig. S3. The FT-IR spectrum of the solvent mixture, 1-dodecanol and 1-chlorododecane.

Table S1. Melting point, density and viscosity of the mixtures mentioned in the experiment.

| Types of the mixture (HBD:HBA=2:1) |                          | Melting point( $^\circ\text{C}$ ) | Density(g/mL) | Viscosity( $\text{mm}^2/\text{s}$ ) |
|------------------------------------|--------------------------|-----------------------------------|---------------|-------------------------------------|
| Component 1                        | Component 2              |                                   |               |                                     |
| $\text{C}_{12}\text{OH}$           | $\text{C}_{12}\text{Cl}$ | 18.1                              | 0.853         | 13.44                               |
|                                    | $\text{C}_{14}\text{Br}$ | 6.5                               | 0.929         | 12.77                               |
| $\text{C}_{11}\text{OH}$           | $\text{C}_{12}\text{Cl}$ | 8.1                               | 0.869         | 9.75                                |
| $\text{C}_{14}\text{OH}$           |                          | 33.4                              | –             | –                                   |

\* $\text{C}_{12}\text{OH}$ : 1-dodecanol

$\text{C}_{11}\text{OH}$ : 1-undecanol

$\text{C}_{14}\text{OH}$ : 1-tetradecanol

$\text{C}_{12}\text{Cl}$ : 1-chlorododecane

$\text{C}_{14}\text{Br}$ : 1-bromotetradecane

Table S2. Analytical performance data for spike recovery experiment in blank tea, spike level: 10  $\mu\text{g/L}$ , 50  $\mu\text{g/L}$ , 100  $\mu\text{g/L}$ . (n=3)

| Pyrethroid    | green tea                          |      |                 | black tea                          |      |                 |
|---------------|------------------------------------|------|-----------------|------------------------------------|------|-----------------|
|               | Spike level<br>( $\mu\text{g/L}$ ) | RSD  | Recovery<br>(%) | Spike level<br>( $\mu\text{g/L}$ ) | RSD  | Recovery<br>(%) |
| deltamethrin  | 10                                 | 3.4% | 89.3%           | 10                                 | 4.7% | 97.6%           |
|               | 50                                 | 4.1% | 81.2%           | 50                                 | 4.5% | 91.5%           |
|               | 100                                | 4.2% | 92.4%           | 100                                | 4.5% | 89.4%           |
| etofenprox    | 10                                 | 2.9% | 87.5%           | 10                                 | 5.0% | 85.9%           |
|               | 50                                 | 5.0% | 91.2%           | 50                                 | 4.8% | 92.1%           |
|               | 100                                | 4.7% | 93.5%           | 100                                | 3.9% | 92.5%           |
| bifenthrin    | 10                                 | 4.8% | 91.4%           | 10                                 | 4.8% | 94.2%           |
|               | 50                                 | 4.3% | 95.7%           | 50                                 | 4.2% | 103.7%          |
|               | 100                                | 3.3% | 92.8%           | 100                                | 3.5% | 98.1%           |
| fenpropathrin | 10                                 | 5.1% | 89.6%           | 10                                 | 4.7% | 101.0%          |
|               | 50                                 | 3.2% | 87.3%           | 50                                 | 4.1% | 98.3%           |
|               | 100                                | 2.2% | 92.3%           | 100                                | 3.8% | 92.0%           |
